# Supplementary material for: Efficacy and Safety of Shexiang Tongxin Dropping Pill in Angina Patients with Coronary Slow Flow Phenomenon: A Multi-center, Randomized, Double-blind, Placebo-controlled Phase IV Trial
Source: Research Square preprint supplement (doi:10.21203/rs.3.rs-6600627/v1), 2025-05-15
Supplement: Supplementary file 1 [file 564741b4526d4070cda68178.docx]

TableS1 Exclusion criteria

| **Exclusion criteria** |
| --- |
| Patients with poorly controlled hypertension (SBP≥160mmHg or DBP≥100mmHg) or hypotension (SBP < 90mmHg)  Patients with stenosis >50% in any of the 3 main coronary arteries  Patients with severe cardiac dysfunction and known ejection fraction < 30%, or New York Heart Association (NYHA) grade III or above, hypertrophic obstructive cardiomyopathy, moderate to severe aortic stenosis or insufficiency  Patients with severe arrhythmia (atrial fibrillation, atrial flutter, paroxysmal ventricular tachycardia, high grade atrioventricular block), QT/QTc prolongation (QTc > 450ms) or with torsade de points history or family history of long QT syndrome or co-use drugs that could extend QT/QTc interval  Patients with severe primary diseases of hepatic, renal and hematopoietic system such as: liver dysfunction (ALT ≥1.5 ULN, AST ≥1.5 ULN), renal dysfunction (serum creatinine >1.5 ULN)  Patients with moderate to severe anemia (hemoglobin < 90g/L)  Patients with thrombocytopenia (platelet count < 100×109 /L)  Patients with white cell count < 3.0×109 /L  Patients known to be pregnant or lactating  Patients with known or suspected to be allergic to the drugs in this study or allergic constitution  Patients with clinically significant complications, including severe cardiopulmonary insufficiency, pulmonary hypertension, chronic obstructive pulmonary disease, history of cerebral hemorrhage or epilepsy, and patients requiring anticonvulsants  Patients with a history of malignancy within 5 years  Patients with active uncontrollable infection  Patients with psychiatric disorders  Patients with life expectancy shorter than the duration of the experiment |

Table S2. Changes in CTFC in the LAD, LCX, and RCA branches after 4 weeks of treatment.

|  | STDP | | | | Placebo | | | | p |
| --- | --- | --- | --- | --- | --- | --- | --- | --- | --- |
| Baseline | Week4 | Changes | p | Baseline | Week4 | Changes | p |
| LAD | 47.06 | 42.94 | -4.12 | <0.001 | 46.76 | 45.88 | -0.59 | 0.540 | 0.008 |
| (39.08, 58.24) | (34.12, 55.29) | （-10.59,0.59） | (37.06, 58.24) | (37.65, 57.65) | (-7.06,7.06) |
| LCX | 54.00 | 48.00 | -4.00 | 0.001 | 49.50 | 49.00 | 0.00 | 0.343 | 0.044 |
| (40.71, 66.00) | (40.71, 61.00) | (-14.00, 4.00) | (40.00, 60.00) | (36.43, 60.00) | (-9.00,5.00) |
| RCA | 53.50 | 53.00 | -1.00 | 0.082 | 50.32 | 54.50 | 2.50 | 0.563 | 0.073 |
| (39.00, 72.86) | (38.71, 66.43) | (-13.29, 7.00) | (38.00, 63.00) | (40.00, 71.00) | (-8.00,10.00) |
| Average | 49.29 | 46.92 | -3.49 | 0.007 | 46.31 | 50.06 | 1.83 | 0.105 | 0.003 |
| (43.10, 59.75) | (40.64, 55.15) | (-10.48, 3.62) | (40.13, 56.42) | (40.02, 59.92) | (-2.59,5.39) |

Table S3. SAQ scores and ECG parameters before and after 4 weeks of treatment.

|  | STDP | |  | Placebo | |  | p |
| --- | --- | --- | --- | --- | --- | --- | --- |
| Baseline | Week4 | p | Baseline | Week4 | p |
| **SAQ** |  |  |  |  |  |  |  |
| Summary score | 297.34 ± 61.85 | 372.82 ± 43.72 |  | 306.51± 62.96 | 360.97 ± 48.18 |  | 0.131 |
| Physical limitation domain | 71.11(57.78,77.78) | 74.44(66.67,80.00) | <0.001 | 71.11(62.22,77.78) | 73.33(66.67,80.00) | <0.001 | 0.438 |
| Angina stability domain | 50.00(25.00,50.00) | 75.00(75.00,100.00) | <0.001 | 50.00(25.00,50.00) | 75.00(50.00,100.00) | <0.001 | 0.389 |
| Angina frequency domain | 80.00(60.00,90.00) | 90.00(80.00,100.00) | <0.001 | 80.00(70.00,90.00) | 90.00(80.00,100.00) | <0.001 | 0.305 |
| Treatment satisfaction domain | 64.71(47.06,76.47) | 76.47(70.59,82.35) | <0.001 | 70.59(52.94,76.47) | 76.47(70.59,82.35) | <0.001 | 0.187 |
| Quality of life domain | 50.00(33.33,58.33) | 58.33(50.00,75.00) | <0.001 | 50.00(41.67,58.33) | 58.33(45.83,75.00) | <0.001 | 0.195 |
| **ECG parameters** |  |  |  |  |  |  |  |
| ST segment depression (mV) | 0.00(0.00,0.03) | 0.00(0,00,0.00) | 0.351 | 0.00(0,00,0.00) | 0.00(0,00,0.00) | 0.188 | 0.702 |
|  |
| T-wave inversion (mV) | 0.00(0,00,0.20) | 0.00(0,00,0.30) | 0.105 | 0.00(0,00,0.20) | 0.00(0,00,0.28) | 0.025 | 0.035 |  |
